# Supplementary material for: Bioinformatic Inference of Specific and General Transcription Factor Binding Sites in the Plant Pathogen Phytophthora infestans
Source: PLoS One. 2012 Dec 12;7(12):e51295. doi: 10.1371/journal.pone.0051295 (PMC3520976; doi:10.1371/journal.pone.0051295)
Supplement: Table S1 — Predicted DNA binding domains, orthologs of known transcription factors and analyzed genomes in this study. (A) List of the identified DNA-binding domains in the predicted proteomes of the three analyzed Phytophthora spp. and four non-pathogenic sister taxa and their relative abundances. Domains were either derived from DBD (D) or manually added (M). (B) List of known transcription factors binding eukaryotic core promoter elements and their orthologs in eighteen species including five oomycetes. (C) Names, versions and sources of different eukaryotic proteomes that were used to define the orthologs of known transcription factors as well as the predicted transcription factor repertoire in Phytophthora spp. (XLS) [file pone.0051295.s002.xls]

## Sheet: Tab S1A
Tab SA1: List of the identified DNA-binding domains in the predicted proteomes of the three analyzed Phytophthora spp. and four non-pathogenic sister taxa and their relative abundances. Domains were either derived from DBD (D) or manually added (M).
#PFAM-ID	Source	Description	P. infestans	P. ramorum	P. sojae	E. siliculosus	A. anophagefferens	P. tricornutum	T. pseudonana
PF00249	M	Myb-like DNA-binding domain	45	55	58	46	45	24	26
PF00447	M	HSF-type DNA-binding	17	16	20	21	22	64	96
PF13921	M	Myb-like DNA-binding domain	17	18	23	29	39	18	21
PF00505	M	HMG (high mobility group) box	6	6	5	13	14	30	20
PF00170	M	bZIP transcription factor	15	17	13	12	4	10	17
PF00096	D	Zinc finger, C2H2 type	20	22	24	3	0	1	0
PF07716	D	Basic region leucine zipper	11	14	11	12	1	6	13
PF02135	D	TAZ zinc finger	7	5	5	6	5	5	7
PF01167	D	Tub family	6	8	7	8	3	1	2
PF05920	M	Homeobox KN domain	5	5	4	3	0	3	10
PF00046	D	Homeobox domain	6	6	5	3	0	0	9
PF00313	D	'Cold-shock' DNA-binding domain	1	1	1	1	12	5	5
PF00010	D	Helix-loop-helix DNA-binding domain	5	6	6	2	0	2	4
PF02319	D	E2F/DP family winged-helix DNA-binding domain	4	3	3	3	2	5	3
PF00847	D	AP2 domain	1	0	1	4	6	1	7
PF06839	D	GRF zinc finger	3	1	4	6	1	1	1
PF02892	D	BED zinc finger	5	5	5	0	0	0	1
PF00352	M	Transcription factor TFIID (or TATA-binding protein, TBP)	3	3	3	2	1	1	1
PF05225	D	helix-turn-helix, Psq domain	5	4	4	1	0	0	0
PF12776	M	Myb/SANT-like DNA-binding domain	9	1	3	0	0	0	0
PF00382	M	Transcription factor TFIIB repeat	2	2	2	1	1	1	1
PF02928	D	C5HC2 zinc finger	2	3	1	1	1	1	1
PF01381	M	Helix-turn-helix	1	1	1	1	1	1	2
PF01754	D	A20-like zinc finger	1	2	1	1	0	0	2
PF02045	D	CCAAT-binding transcription factor (CBF-B/NF-YA) subunit B	2	2	1	1	0	1	0
PF02791	D	DDT domain	1	1	1	2	0	0	2
PF03343	D	SART-1 family	1	1	1	1	1	1	1
PF03749	D	Sugar fermentation stimulation protein	2	1	1	0	2	0	1
PF05764	D	YL1 nuclear protein	1	2	1	1	0	1	1
PF07093	D	SGT1 protein	1	2	2	1	0	0	1
PF04054	D	CCR4-Not complex component, Not1	1	1	1	1	0	1	1
PF13837	M	Myb/SANT-like DNA-binding domain	4	2	0	0	0	0	0
PF02891	D	MIZ zinc finger	1	0	1	1	0	1	1
PF03859	D	CG-1 domain	1	1	1	1	0	0	0
PF00319	D	SRF-type transcription factor (DNA-binding and dimerisation domain)	1	1	1	0	0	0	0
PF08914	M	Rap1 Myb domain	1	1	1	0	0	0	0
PF06320	D	GCN5-like protein 1 (GCN5L1)	1	1	0	0	0	0	0
PF01285	D	TEA/ATTS domain family	0	0	1	0	0	0	0
PF04299	D	Putative FMN-binding domain	0	1	0	0	0	0	0

## Sheet: Tab S1B
Tab S1B: List of known transcription factors binding eukaryotic core promoter elements and their orthologs in eighteen species including five oomycetes.
Name	Element	H. sapiens	D melanogaster	C. elegans	S. cerevisiae	A. thaliana	O. sativa	C. parvum	P. tetraurelia	T. thermophilia	E. silicolusus	A. anophagefferens	P. tricornutum	T. pseudonana	P. ultimum	H. arabidopsidis	P. infestans	P. ramorum	P. sojae
TBP	TATA	ENSP00000375941;ENSP00000442132;ENSP00000416482;ENSP00000375942;ENSP00000230354;ENSP00000400008;ENSP00000247219	FBpp0071596	T20B12.2.1;T20B12.2.2	YER148W	AT3G13445.1;AT1G55520.1;AT1G55520.2	LOC_Os12g39070.1;LOC_Os03g45410.1;LOC_Os10g29660.1	cgd8_2030	GSPATP00006528001;GSPATP00009830001	3812.m02620	Esi0029_0017;Esi0042_0019	33824	10199	264095	PYU1_T014018	813721	PITG_07312T0	Pr_44780T0	Ps_111770T0
TAF1	Inr	ENSP00000379125;ENSP00000406549;ENSP00000441908;ENSP00000421611;ENSP00000389000;ENSP00000276072;ENSP00000362880;ENSP00000362895;ENSP00000418379;ENSP00000406517	FBpp0290837;FBpp0081184;FBpp0089420;FBpp0089369	W04A8.7	YGR274C	AT3G19040.1;AT1G32750.1	LOC_Os06g43790.1	-	-	-	Esi0124_0012	60961	42944	38764	PYU1_T004482	804633	PITG_02547T0	Pr_77562T0	Ps_128220T0
TAF2	Inr	ENSP00000367406	FBpp0076090	Y37E11B.4	YCR042C	AT1G73960.1;AT1G73960.2	LOC_Os09g24440.1	-	-	-	Esi0058_0146	-	-	-	PYU1_T009254	808758	PITG_18882T0;PITG_14044T0	Pr_87443T0;Pr_83075T0;Pr_86369T0;Pr_86782T0;Pr_85479T0	Ps_140691T0
TAF6	DPE	ENSP00000344537;ENSP00000407980;ENSP00000389575;ENSP00000419760;ENSP00000416396;ENSP00000399982	FBpp0074709	Y37E11AL.8;W09B6.2	YGL112C	AT1G04950.1;AT1G04950.2;AT1G04950.3	LOC_Os01g32750.1	-	-	-	Esi0012_0063	-	45009	3021	PYU1_T007721	805779	PITG_03978T0	Pr_82295T0	Ps_136830T0
TAF9	DPE	ENSP00000370201;ENSP00000370197;ENSP00000420947;ENSP00000443924	FBpp0087004	E02H1.6.2;E02H1.6.1	YDL166C	AT5G60340.1	LOC_Os07g22950.2;LOC_Os07g22950.1	cgd3_3270	GSPATP00011556001;GSPATP00011121001	-	Esi0024_0157	58798	7072	32766	PYU1_T004808	806862	PITG_12465T0	Pr_72292T0	Ps_109405T0
TFIIB	BRE	ENSP00000359531	FBpp0079615	W03F9.5.2;W03F9.5.1	YPR086W	AT3G10330.1;AT2G41630.1	LOC_Os05g47480.1;LOC_Os09g36440.1;LOC_Os03g09820.1	cgd8_880	-	-	Esi0018_0092	-	-	-	PYU1_T007940	802647	PITG_14596T0	Pr_94029T0	Ps_133149T0
CBF-A	CCAAT	ENSP00000448250;ENSP00000240055;ENSP00000447486	FBpp0080827	W10D9.4	YBL021C	AT2G38880.6;AT2G38880.3;AT3G53340.1;AT2G38880.8;AT2G37060.1;AT2G38880.5;AT4G14540.1;AT2G38880.1;AT2G38880.7;AT2G38880.4;AT2G37060.3;AT2G37060.2;AT2G38880.2	LOC_Os05g38820.1;LOC_Os05g38820.3;LOC_Os05g38820.2;LOC_Os01g61810.2;LOC_Os05g38820.5;LOC_Os07g41580.1;LOC_Os05g38820.4;LOC_Os01g61810.1;LOC_Os03g29970.1;LOC_Os01g61810.3	cgd4_1720	GSPATP00029158001;GSPATP00030941001	270.m00028	Esi0201_0037	55371;8699	54067	19289	PYU1_T008319	812756	PITG_10861T0	Pr_53940T0	Ps_109527T0
CBF-B*	CCAAT	-	-	-	-	AT1G17590.1;AT3G14020.1;AT1G17590.4;AT1G72830.2;AT1G72830.1;AT1G17590.2;AT1G54160.1;AT1G72830.3;AT1G17590.3	LOC_Os07g41720.1;LOC_Os07g41720.2;LOC_Os03g07880.3;LOC_Os02g53620.1;LOC_Os03g29760.2;LOC_Os03g07880.2;LOC_Os03g29760.1;LOC_Os03g29760.3;LOC_Os03g07880.1	-	-	-	-	-	39335	-	PYU1_T008683;PYU1_T008716	811802;800403	PITG_17109T0;PITG_17070T0	Pr_79846T0;Pr_79817T0	Ps_129160T0
CBF-C	CCAAT	ENSP00000404427;ENSP00000361737;ENSP00000361734;ENSP00000414299;ENSP00000396620;ENSP00000436710;ENSP00000397647;ENSP00000361739;ENSP00000408867;ENSP00000361754;ENSP00000433413;ENSP00000361738;ENSP00000312617;ENSP00000408315;ENSP00000433820;ENSP00000416403;ENSP00000361736;ENSP00000361742;ENSP00000434404;ENSP00000409219	FBpp0070935	F23F1.1	YOR358W	AT1G56170.2;AT1G56170.1	LOC_Os06g45640.1;LOC_Os02g07450.2;LOC_Os02g07450.1	cgd4_310	GSPATP00006754001;GSPATP00002305001	-	Esi0349_0022;Esi0349_0024	8422;26154	7801	33067	PYU1_T005536	802445;802443;811745	PITG_10986T0;PITG_00914T0	Pr_77737T0;Pr_74486T0	Ps_122447T0
*CBF-B orthologs in oomycetes are based on Arabidopsis thaliana

## Sheet: Tab S1C
Tab S1C: Names, versions and sources of different eukaryotic proteomes that were used to define the orthologs of known transcription factors as well as the predicted transcription factor repertoire in Phytophthora spp.
Species	Version	Source
Hyaloperonospora arabidopsidis	8.3	BROAD
Phytophthora infestans	1	BROAD
Phytophthora sojae	1	BROAD
Phytophthora ramorum	1	BROAD
Pythium ultimum	1	BROAD
Arabidopsis thaliana	16.7	Phytozome
Oryza sativa	12	Phytozome
Paramecium tetraurelia	1.57	ParameciumDB
Tetrahymena thermophila	1	ciliate.org
Cryptosporidium parvum	4.4	cryptodb
Thalassiosira pseudonana	3	jgi
Aureococcus anophagefferens	1	jgi
Phaeodactylum tricornutum	2	jgi
Ectocarpus siliculosus	2	BOGAS
Drosophila melanogaster	BSGP5	ensembl
Homo sapiens	GRch37	ensembl
Saccharomyces cerevisiae	EF3.36	ensembl
Caenorhabditis elegans	WS220.63	ensembl
